# Supplementary material for: The effect of vagus nerve stimulation on heart rate and respiration rate and their impact on seizure susceptibility in anaesthetized rats under pentylenetetrazol
Source: Frontiers journal article supplement (doi:10.3389/fnins.2025.1487082), 2025-03-21
Supplement: Data_Sheet_1.pdf [file Data_Sheet_1.pdf]

## Supplementary Material

### 1 Supplementary Figures and Tables

#### 1.1 Supplementary Figures

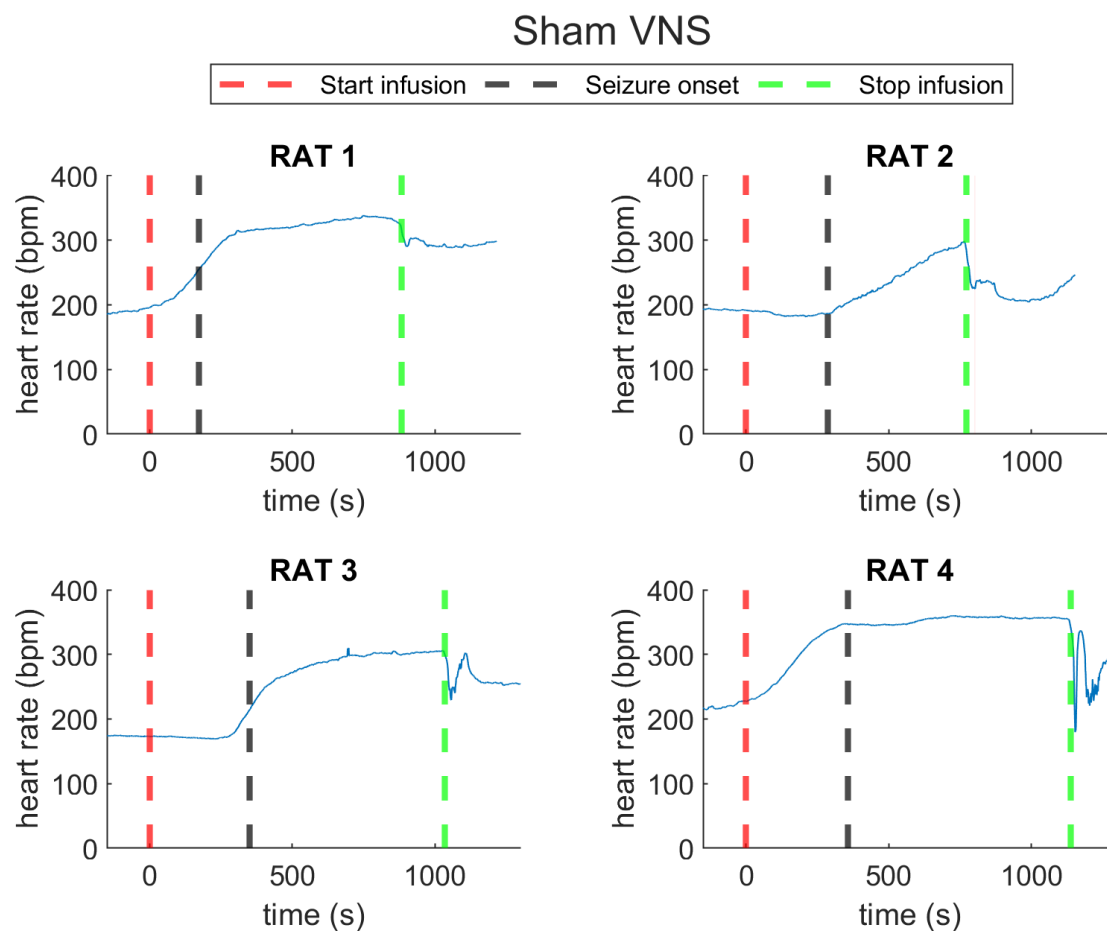

**Supplementary Figure 1.** Heart rate evolution for each rat in the sham stimulation group.

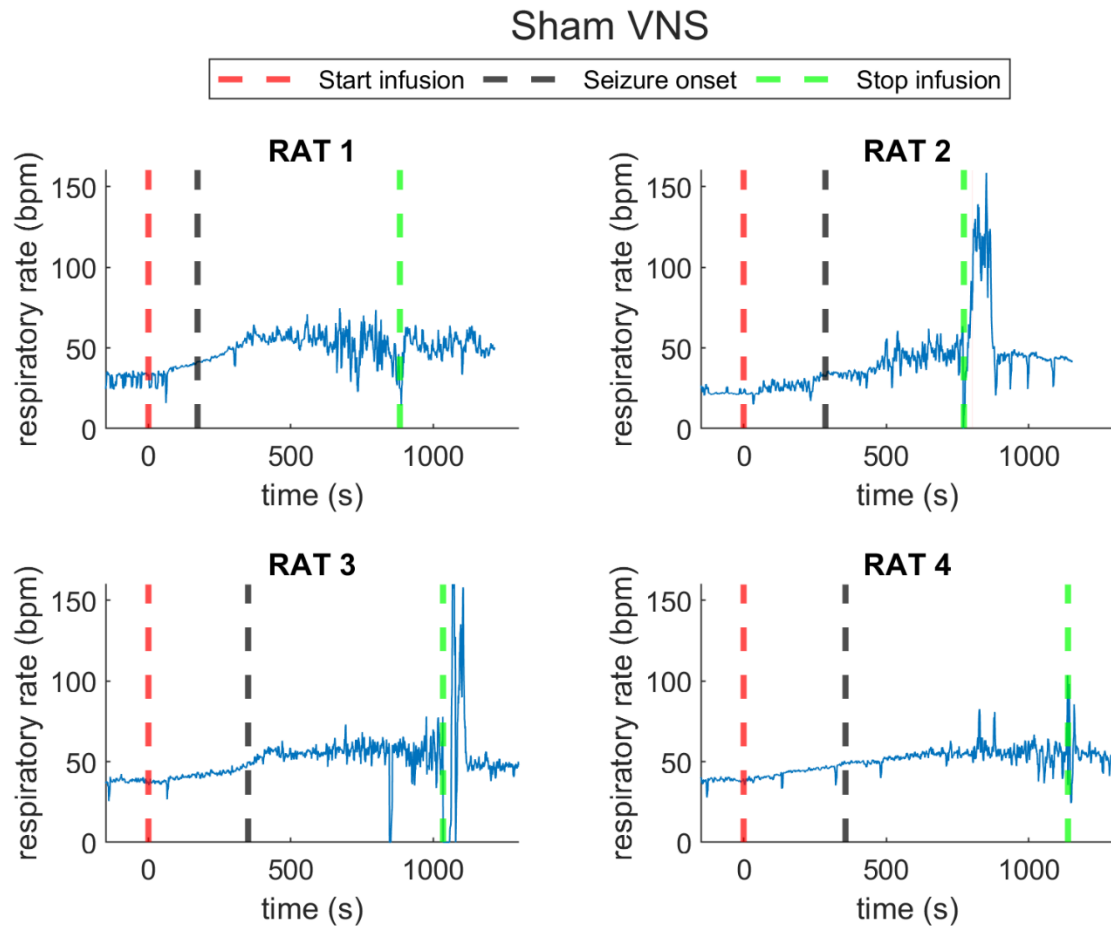

**Supplementary Figure 2.** Breathing rate evolution for each rat in the sham stimulation group.

## Standard VNS

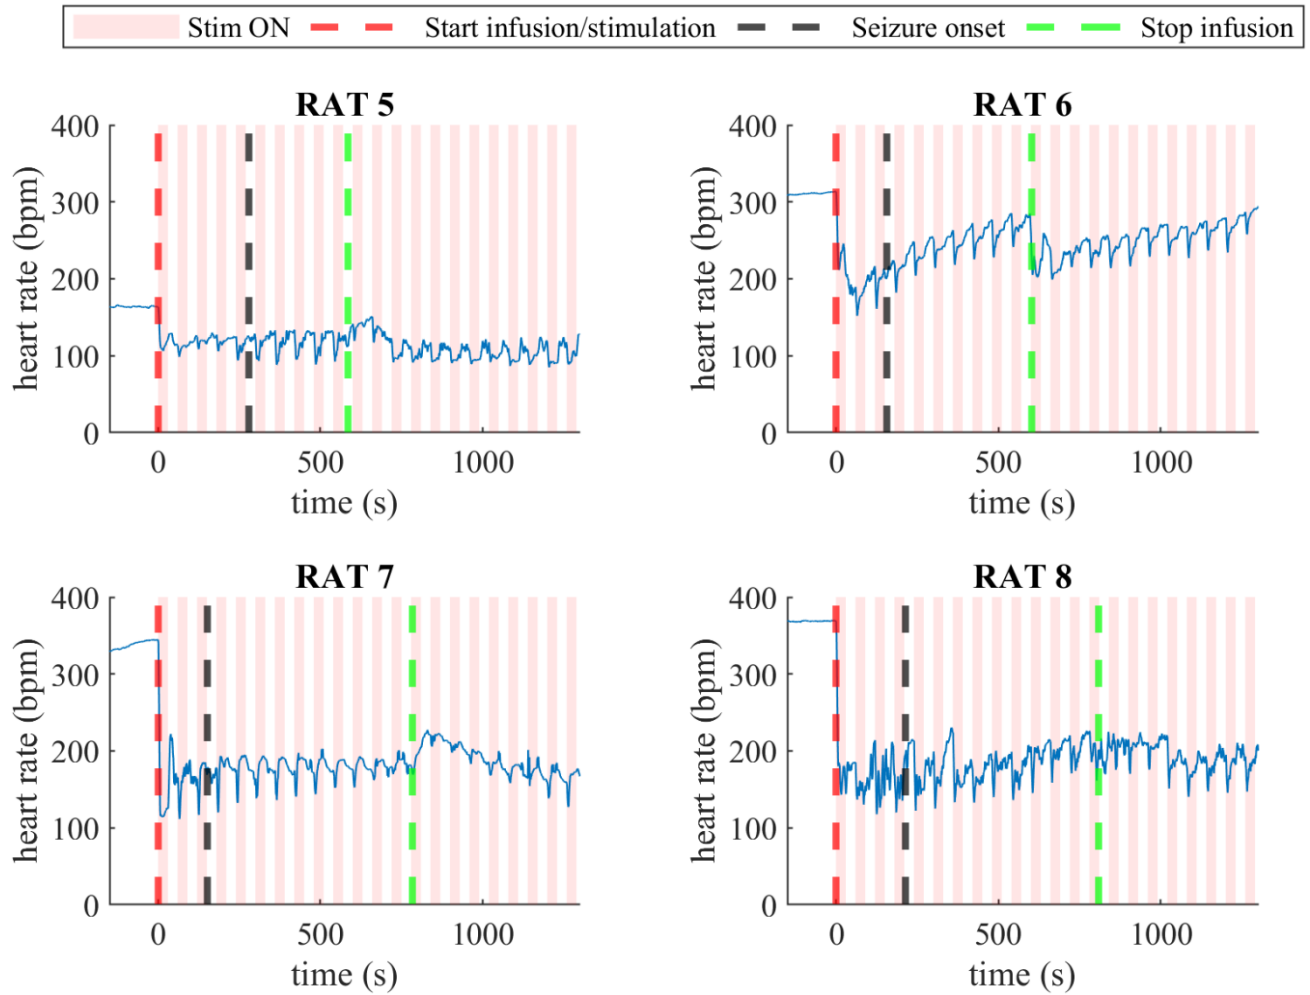

**Supplementary Figure 3.** Heart rate evolution for rats under standard VNS.

## Standard VNS

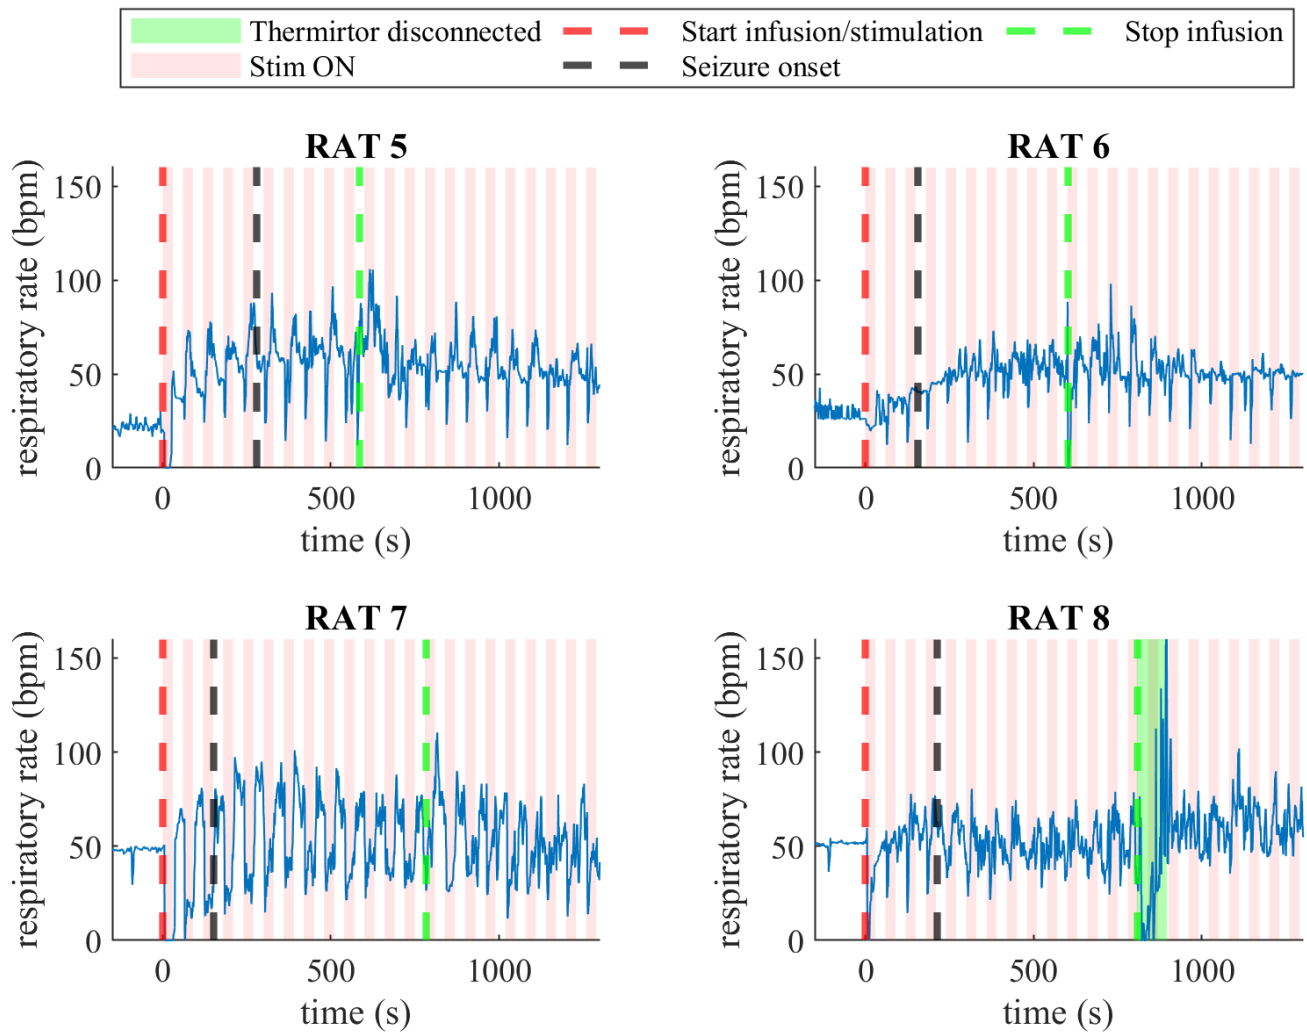**Supplementary Figure 4.** Breathing rate evolution for rats under standard VNS.

## Breathing-synchronized VNS

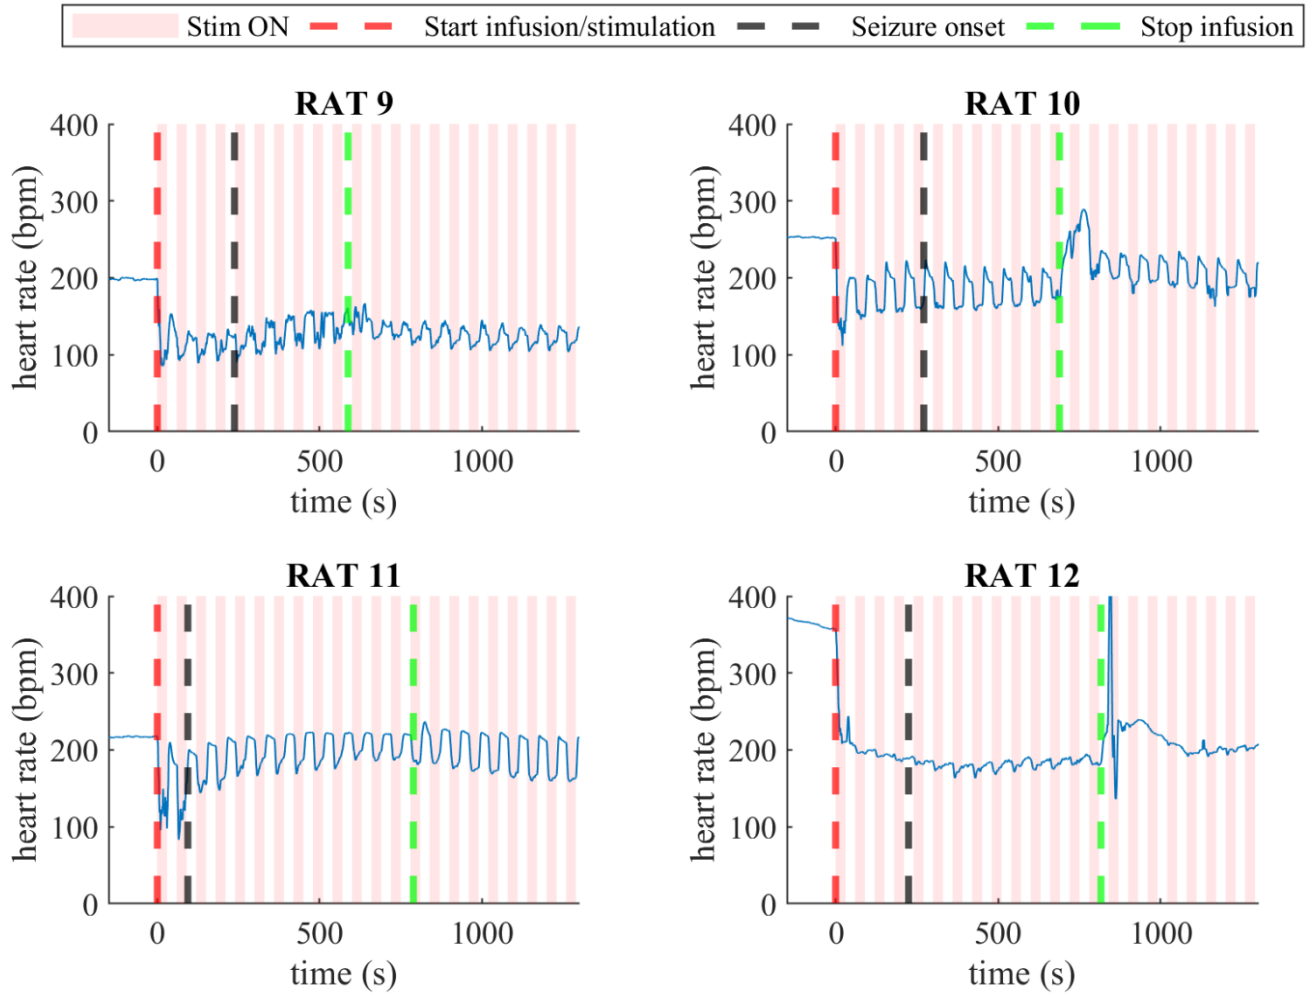

**Supplementary Figure 5.** Heart rate evolution in rats under breathing-synchronized VNS.

## Breathing-synchronized VNS

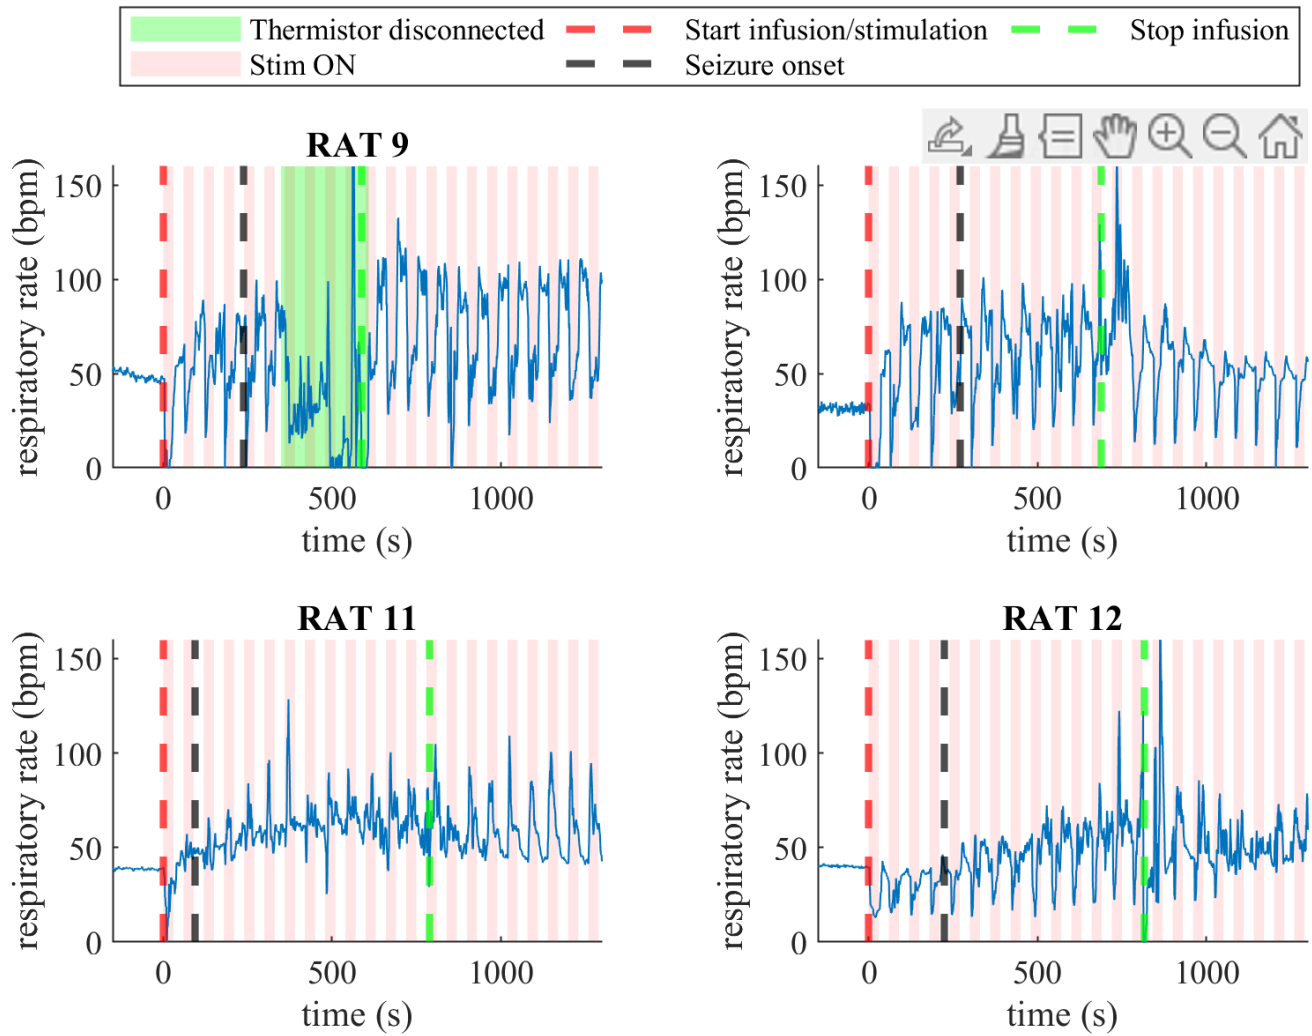

**Supplementary Figure 6.** Breathing rate evolution in rats under breathing-synchronized VNS.

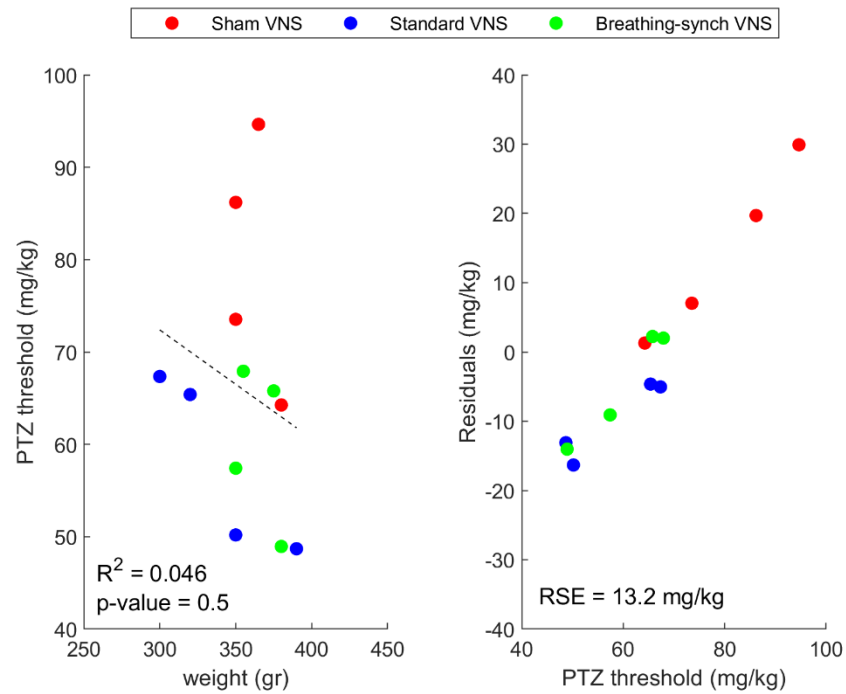

**Supplementary Figure 7.** Left: Linear regression between PTZ threshold and weight. Right: Residuals of the regression (RSE = Residual Standard Error).

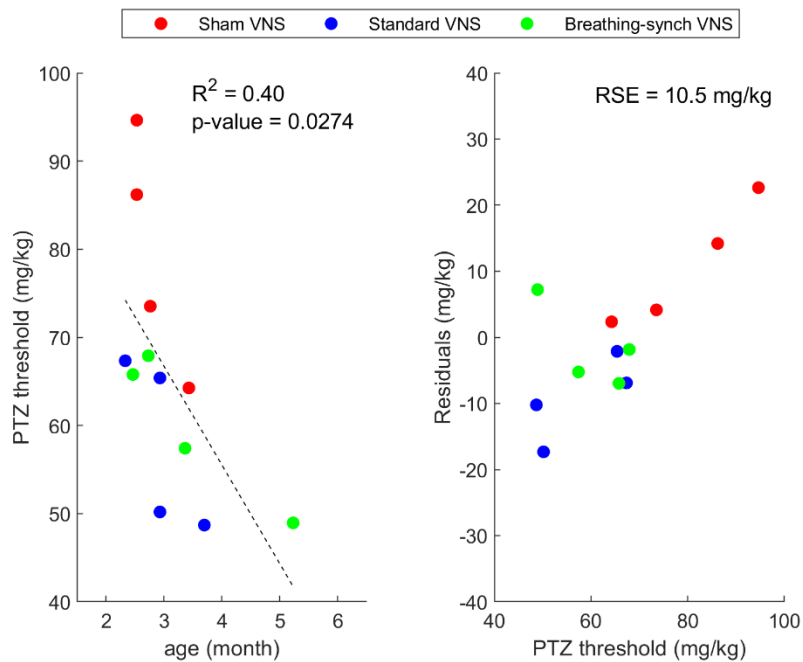

**Supplementary Figure 8.** Left: Linear regression between PTZ threshold and age. Right: Residuals of the regression (RSE = Residual Standard Error).

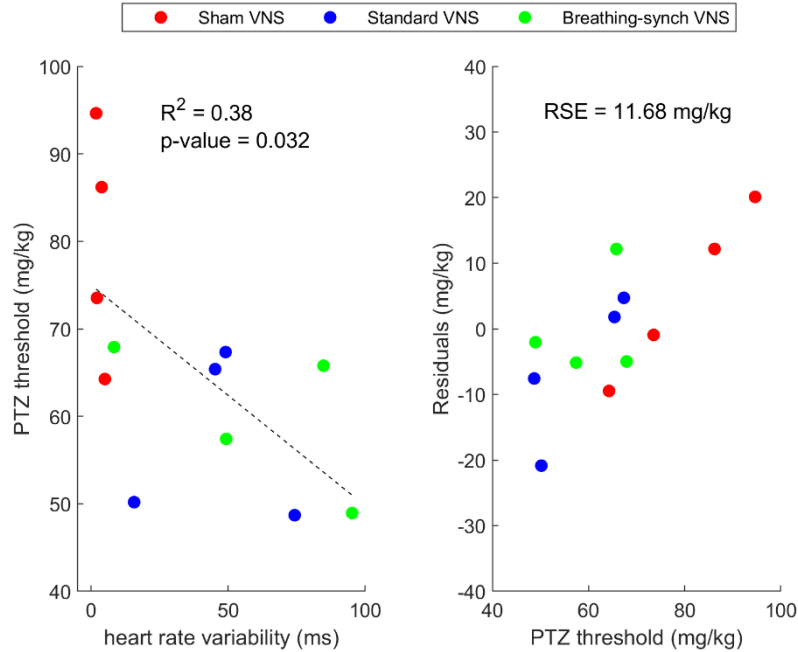

**Supplementary Figure 9.** Left: Linear regression between PTZ threshold and heart rate variability presented during the infusion. Right: Residuals of the regression (RSE = Residual Standard Error).

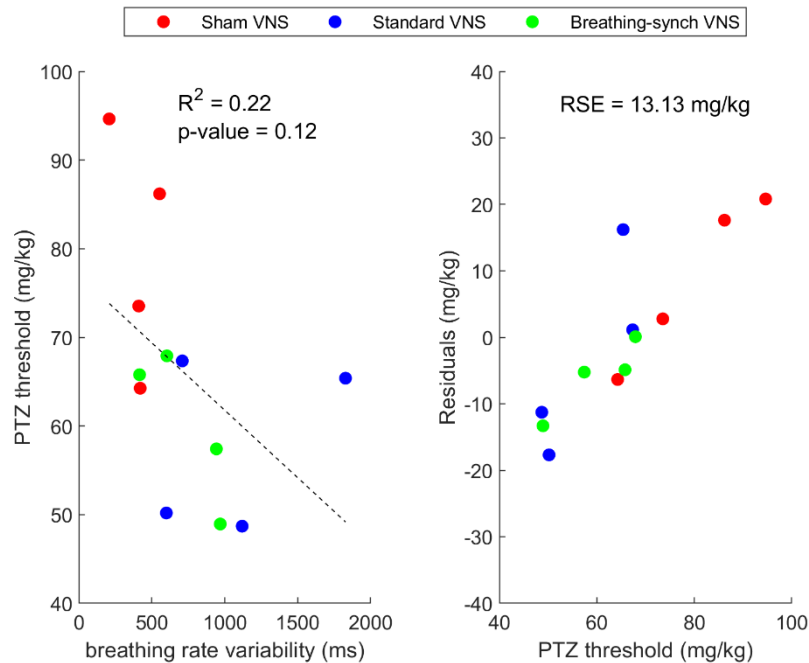

**Supplementary Figure 10.** Left: Linear regression between PTZ threshold and breathing rate variability presented during the infusion. Right: Residuals of the regression (RSE = Residual Standard Error).



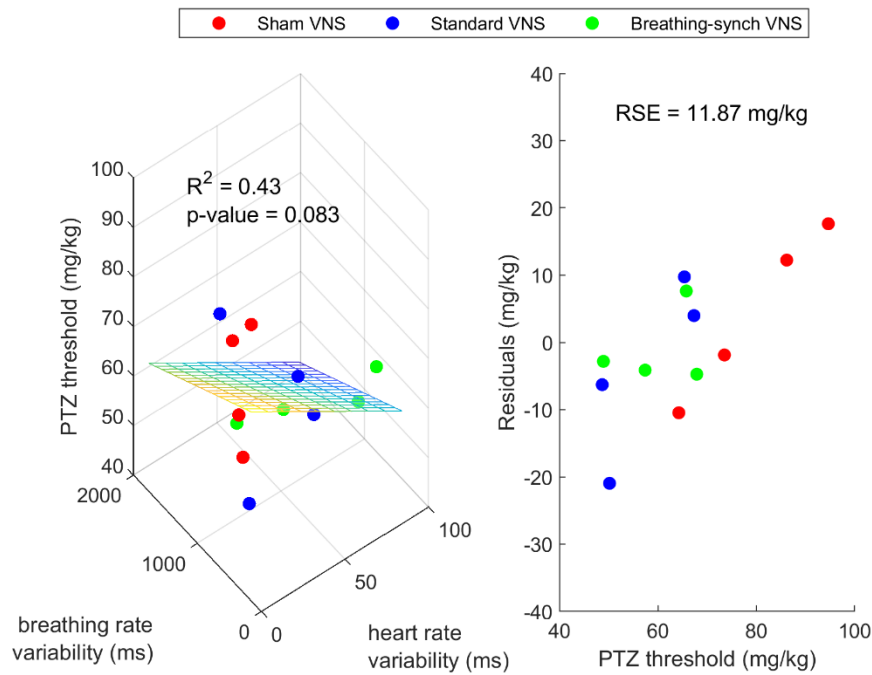

**Supplementary Figure 11.** Left: Linear regression between PTZ threshold and heart rate variability and breathing rate variability. Right: Residuals of the regression (RSE = Residual Standard Error).

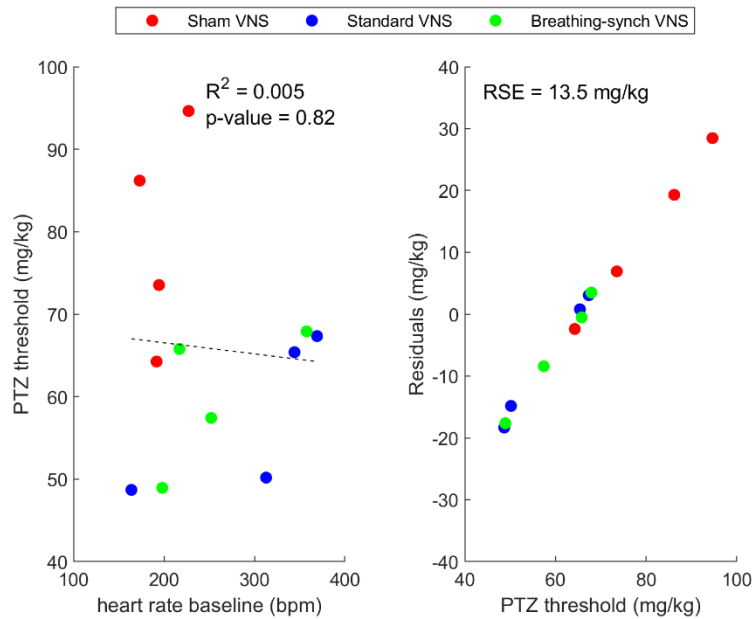

**Supplementary Figure 12.** Left: Linear regression between PTZ threshold and heart rate baseline values. Right: Residuals of the regression (RSE = Residual Standard Error).

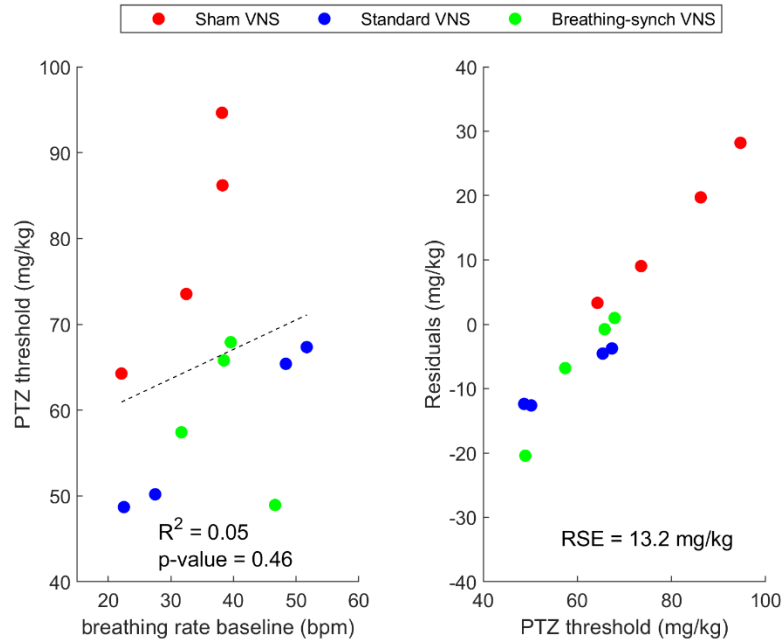

**Supplementary Figure 13.** Left: Linear regression between PTZ threshold and breathing rate baseline values. Right: Residuals of the regression (RSE = Residual Standard Error).

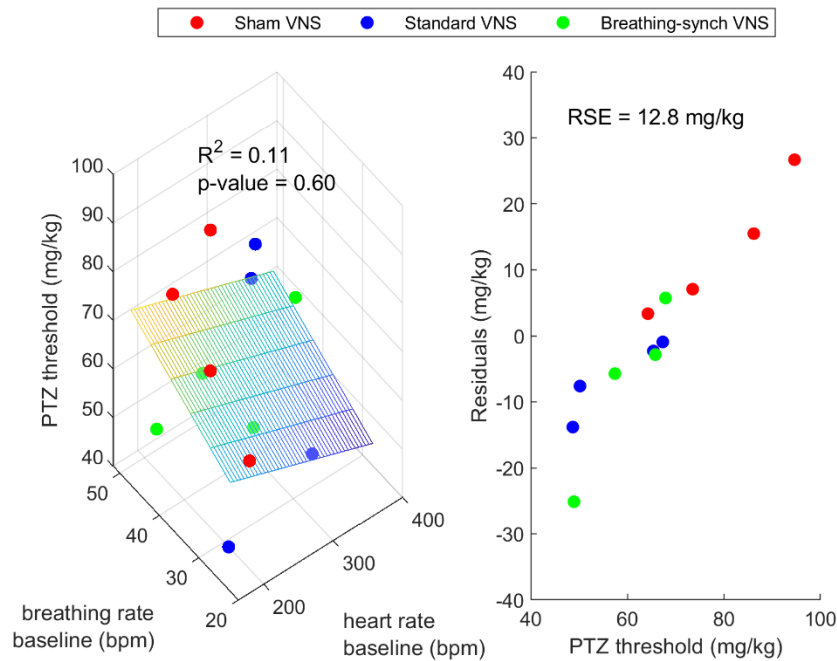

**Supplementary Figure 14.** Left: Linear regression between PTZ threshold and heart rate baseline and breathing rate baseline values. Right: Residuals of the regression (RSE = Residual Standard Error).

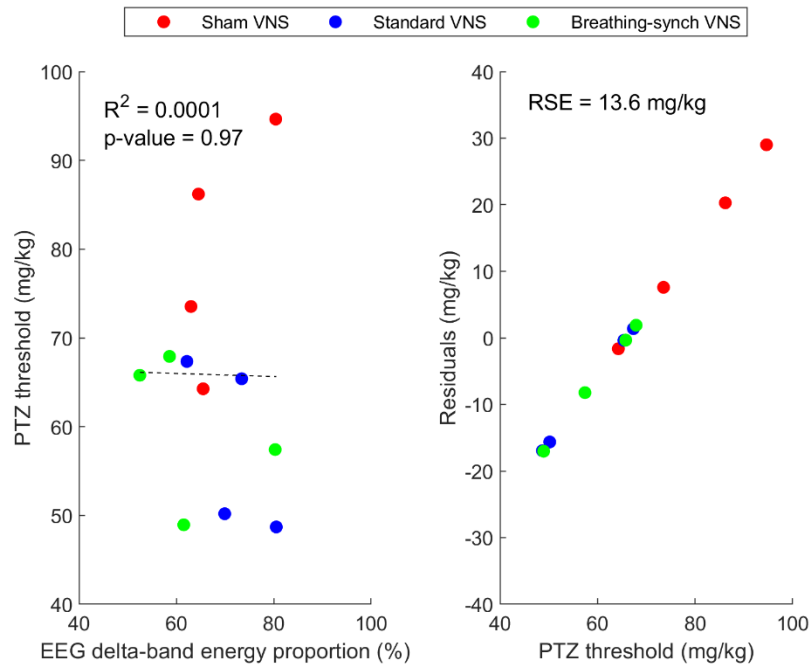

**Supplementary Figure 15.** Left: Linear regression between PTZ threshold and EEG delta-band energy proportion. Right: Residuals of the regression (RSE = Residual Standard Error).

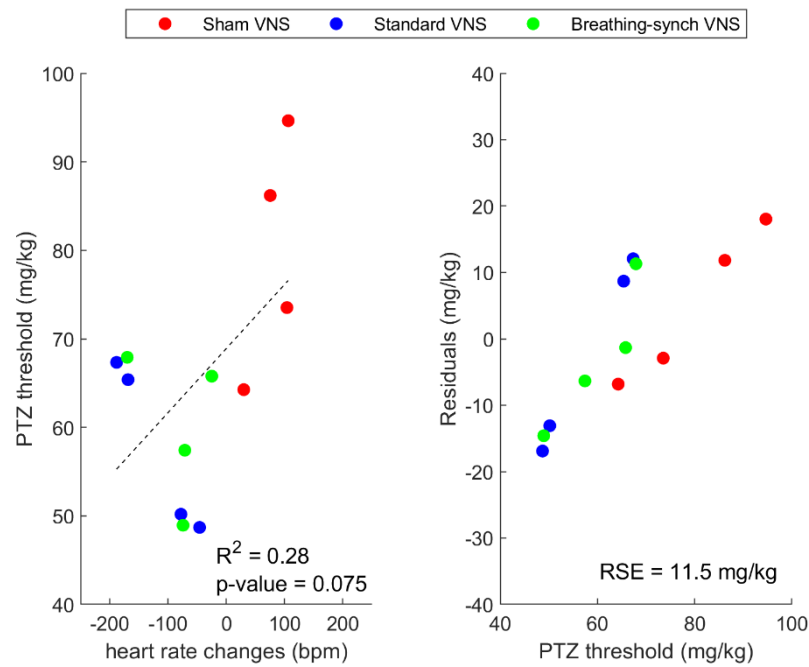

**Supplementary Figure 16.** Left: Linear regression between PTZ threshold and heart rate changes. Right: Residuals of the regression (RSE = Residual Standard Error).

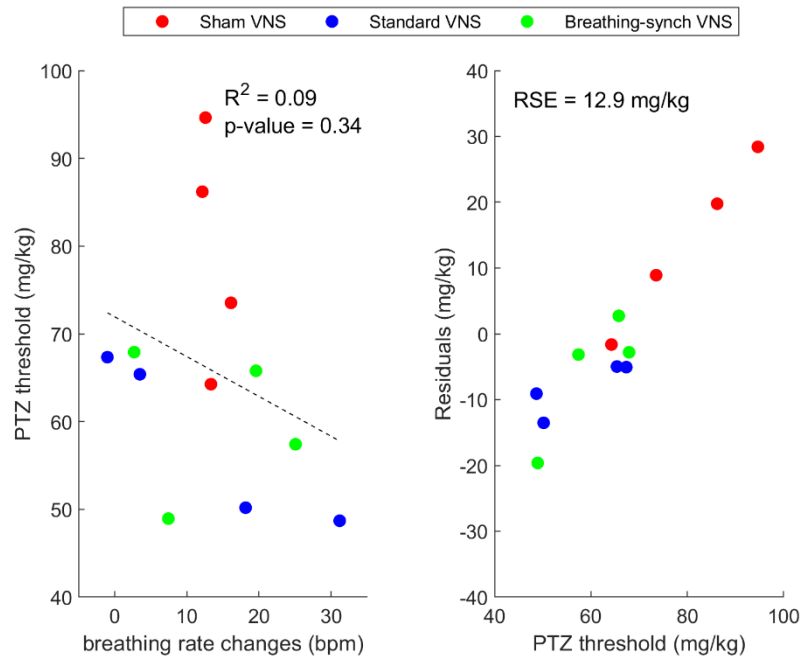

**Supplementary Figure 17.** Left: Linear regression between PTZ threshold and breathing rate changes. Right: Residuals of the regression (RSE = Residual Standard Error).

## 1.2 Supplementary Tables

| <b>Sham VNS</b>                    | Weight<br>(gr)   | Age<br>(month) | <b>Standard VNS</b>                | Weight<br>(gr)   | Age<br>(month) | <b>Breathing-synchronized VNS</b>  | Weight<br>(gr)   | Age<br>(month) |
|------------------------------------|------------------|----------------|------------------------------------|------------------|----------------|------------------------------------|------------------|----------------|
| Rat 1                              | 350              | 2.8            | Rat 5                              | 390              | 3.7            | Rat 9                              | 380              | 5.2            |
| Rat 2                              | 380              | 3.4            | Rat 6                              | 350              | 2.9            | Rat 10                             | 350              | 3.4            |
| Rat 3                              | 350              | 2.5            | Rat 7                              | 320              | 2.9            | Rat 11                             | 375              | 2.5            |
| Rat 4                              | 365              | 2.5            | Rat 8                              | 300              | 2.3            | Rat 12                             | 355              | 2.7            |
| <b>Average <math>\pm</math> SD</b> | 361.3 $\pm$ 14.4 | 2.8 $\pm$ 0.4  | <b>Average <math>\pm</math> SD</b> | 340.0 $\pm$ 39.2 | 3.0 $\pm$ 0.6  | <b>Average <math>\pm</math> SD</b> | 365.0 $\pm$ 14.7 | 3.5 $\pm$ 1.2  |

**Supplementary Table 1.** Weight and age of the rats. The total average weight was  $355.4 \pm 25.8$  grams, and for age was  $3.1 \pm 0.8$  months.

|                     | Sham VNS |       |       |       | Standard VNS |       |       |       | Breathing-synchronized VNS |        |        |        |                                    |
|---------------------|----------|-------|-------|-------|--------------|-------|-------|-------|----------------------------|--------|--------|--------|------------------------------------|
|                     | Rat 1    | Rat 2 | Rat 3 | Rat 4 | Rat 5        | Rat 6 | Rat 7 | Rat 8 | Rat 9                      | Rat 10 | Rat 11 | Rat 12 | <b>Average <math>\pm</math> SD</b> |
| Phase Locking Index | 0.79     | 0.77  | 0.81  | 0.90  | 0.8          | 0.73  | 0.93  | 0.94  | 0.93                       | 0.95   | 0.81   | 0.89   | 0.86 $\pm$ 0.08                    |

**Supplementary Table 2.** Phase Locking Index between the VENG envelope and the respiration signal for each rat.

|            | Sham VNS |       |       |       | Standard VNS |       |       |       | Breathing-synchronized VNS |        |        |        |                         |
|------------|----------|-------|-------|-------|--------------|-------|-------|-------|----------------------------|--------|--------|--------|-------------------------|
|            | Rat 1    | Rat 2 | Rat 3 | Rat 4 | Rat 5        | Rat 6 | Rat 7 | Rat 8 | Rat 9                      | Rat 10 | Rat 11 | Rat 12 | <b>Average<br/>± SD</b> |
| Preictal   | 64.3     | 71.4  | 74.0  | 81.9  | 81.9         | 77.9  | 78.3  | 75.8  | 67.9                       | 74.7   | 60.5   | 70.2   | 73.2 ± 6.7              |
| Baseline   | 63.0     | 65.5  | 64.5  | 80.4  | 80.5         | 69.9  | 73.4  | 62.2  | 61.5                       | 80.3   | 52.5   | 58.6   | 67.7 ± 9.3              |
| Difference | 1.3      | 5.9   | 9.5   | 1.5   | 1.3          | 8.0   | 4.9   | 13.7  | 6.4                        | -5.6   | 8.0    | 11.6   | 5.5 ± 5.3               |

**Supplementary Table 3.** EEG delta-band energy proportion (%) per rat in baseline and preictal periods.

|                                    | Heart rate (bpm)                   |                                    |                                    |                                    |
|------------------------------------|------------------------------------|------------------------------------|------------------------------------|------------------------------------|
|                                    | Baseline                           | Infusion                           | Difference                         | Post-infusion                      |
| Rat 1                              | 194.5                              | 298.8                              | +104.3                             | 291.8                              |
| Rat 2                              | 191.8                              | 222.0                              | +30.2                              | 208.7                              |
| Rat 3                              | 173.1                              | 248.8                              | +75.7                              | 254.0                              |
| Rat 4                              | 227.2                              | 333.8                              | +106.6                             | 310.9                              |
| <b>Average <math>\pm</math> SD</b> | <b>196.6 <math>\pm</math> 22.5</b> | <b>275.8 <math>\pm</math> 50.0</b> | <b>+79.2 <math>\pm</math> 35.5</b> | <b>266.3 <math>\pm</math> 45.1</b> |

**Supplementary Table 4.** Mean heart rate per rat in the sham stimulation group. The difference is always with respect to the baseline values.

|                                    | Breathing rate (bpm)             |                                  |                                   |                                  |
|------------------------------------|----------------------------------|----------------------------------|-----------------------------------|----------------------------------|
|                                    | Baseline                         | Infusion                         | Difference                        | Post-infusion                    |
| Rat 1                              | 32.5                             | 48.6                             | +16.1                             | 52.0                             |
| Rat 2                              | 22.1                             | 35.5                             | +13.3                             | 44.0                             |
| Rat 3                              | 38.2                             | 50.4                             | +12.2                             | 47.1                             |
| Rat 4                              | 38.2                             | 50.8                             | +12.6                             | 52.5                             |
| <b>Average <math>\pm</math> SD</b> | <b>32.8 <math>\pm</math> 7.6</b> | <b>46.3 <math>\pm</math> 7.3</b> | <b>+13.6 <math>\pm</math> 1.8</b> | <b>48.9 <math>\pm</math> 4.1</b> |

**Supplementary Table 5.** Mean breathing rate per rat in the sham stimulation group. The difference is always with respect to the baseline values.

|                         | Heart rate (bpm)    |                     |                      |                     |                      |                     |                      |                     |
|-------------------------|---------------------|---------------------|----------------------|---------------------|----------------------|---------------------|----------------------|---------------------|
|                         | Baseline            | Infusion            | Difference           | ON period           | Difference           | OFF period          | Difference           | Post-infusion       |
| Rat 5                   | 164.0               | 118.4               | -45.6                | 113.0               | -51.0                | 124.4               | -39.5                | 105.3               |
| Rat 6                   | 312.8               | 235.2               | -77.7                | 228.70              | -84.1                | 241.7               | -71.1                | 242.0               |
| Rat 7                   | 344.2               | 175.6               | -168.5               | 173.8               | -170.4               | 177.5               | -166.7               | 185.6               |
| Rat 8                   | 369.1               | 180.9               | -188.2               | 171.1               | -198.0               | 191.8               | -177.3               | 189.2               |
| <b>Average<br/>± SD</b> | <b>297.5 ± 92.0</b> | <b>177.5 ± 47.7</b> | <b>-120.0 ± 69.1</b> | <b>171.6 ± 47.3</b> | <b>-125.9 ± 69.6</b> | <b>183.9 ± 48.3</b> | <b>-113.7 ± 68.7</b> | <b>180.5 ± 56.4</b> |

**Supplementary Table 6.** Mean heart rate per rat in the standard VNS stimulation group. The difference is always with respect to the baseline values.

|                         | Breathing rate (bpm) |                 |                   |                 |                  |                 |                   |                   |
|-------------------------|----------------------|-----------------|-------------------|-----------------|------------------|-----------------|-------------------|-------------------|
|                         | Baseline             | Infusion        | Difference        | ON period       | Difference       | OFF period      | Difference        | Post-infusion     |
| Rat 5                   | 22.5                 | 53.7            | +31.2             | 51.3            | +28.8            | 56.2            | +33.7             | 53.5              |
| Rat 6                   | 27.5                 | 45.7            | +18.2             | 44.5            | +16.9            | 46.9            | +19.4             | 53.6              |
| Rat 7                   | 48.4                 | 51.9            | +3.5              | 34.8            | -13.6            | 68.8            | +20.4             | 51.8              |
| Rat 8                   | 51.7                 | 50.7            | -1.0              | 50.4            | -1.3             | 51.2            | -0.5              | 59.2              |
| <b>Average<br/>± SD</b> | <b>37.5±14.6</b>     | <b>50.5±3.4</b> | <b>+13.0±14.6</b> | <b>45.2±7.6</b> | <b>+7.7±18.8</b> | <b>55.8±9.5</b> | <b>+18.2±14.1</b> | <b>54.5 ± 3.2</b> |

**Supplementary Table 7.** Mean breathing rate per rat in the standard VNS stimulation group. The difference is always with respect to the baseline values.



|                         | Heart rate (bpm)  |                   |                   |                   |                   |                   |                   |                         |
|-------------------------|-------------------|-------------------|-------------------|-------------------|-------------------|-------------------|-------------------|-------------------------|
|                         | Baseline          | Infusion          | Difference        | ON period         | Difference        | OFF period        | Difference        | Post-infusion           |
| Rat 9                   | 198.1             | 124.1             | -74.0             | 115.1             | -83.0             | 135.5             | -62.6             | 126.6                   |
| Rat 10                  | 252.1             | 181.1             | -71.0             | 165.6             | -86.5             | 196.5             | -55.6             | 209.4                   |
| Rat 11                  | 217.1             | 192.4             | -24.7             | 175.9             | -41.2             | 209.1             | -8.0              | 195.8                   |
| Rat 12                  | 357.7             | 187.8             | -169.9            | 186.5             | -171.2            | 189.1             | -168.6            | 204.5                   |
| <b>Average<br/>± SD</b> | <b>256.2±71.2</b> | <b>171.3±31.9</b> | <b>-84.9±61.0</b> | <b>160.8±31.6</b> | <b>-95.5±54.5</b> | <b>182.5±32.4</b> | <b>-73.7±67.8</b> | <b>184.1 ±<br/>38.7</b> |

**Supplementary Table 8.** Mean heart rate per rat in the breathing-synchronized VNS stimulation group. The difference is always with respect to the baseline values.

|                         | Breathing rate (bpm) |                 |                   |                 |                  |                  |                   |                   |
|-------------------------|----------------------|-----------------|-------------------|-----------------|------------------|------------------|-------------------|-------------------|
|                         | Baseline             | Infusion        | Difference        | ON period       | Difference       | OFF period       | Difference        | Post-infusion     |
| Rat 9                   | 46.6                 | 54.1            | +7.5              | 43.6            | -3.0             | 69.0             | +22.4             | 36.8              |
| Rat 10                  | 31.7                 | 56.8            | +25.1             | 42.9            | +11.2            | 71.2             | +39.5             | 56.3              |
| Rat 11                  | 38.5                 | 58.1            | +19.6             | 59.5            | +21.0            | 56.7             | +18.2             | 58.0              |
| Rat 12                  | 39.6                 | 42.3            | +2.7              | 36.8            | -2.8             | 48.4             | +8.8              | 49.3              |
| <b>Average<br/>± SD</b> | <b>39.1±6.1</b>      | <b>52.8±7.2</b> | <b>+13.7±10.4</b> | <b>45.7±9.7</b> | <b>+6.6±11.7</b> | <b>61.3±10.7</b> | <b>+22.2±12.8</b> | <b>50.1 ± 9.7</b> |

**Supplementary Table 9.** Mean breathing rate per rat in the breathing-synchronized VNS stimulation group. The difference is always with respect to the baseline values.

|        | Stimulation onset |            |     |     |     |     |     |     |     |     |     |     |     |     | Average<br>± SD |
|--------|-------------------|------------|-----|-----|-----|-----|-----|-----|-----|-----|-----|-----|-----|-----|-----------------|
|        | 1                 | 2          | 3   | 4   | 5   | 6   | 7   | 8   | 9   | 10  | 11  | 12  | 13  | 14  |                 |
| Rat 5  | <u>22.7</u>       | 3.2        | 3.3 | 3.5 | 3.5 | 3.9 | 4.2 | 3.7 | 4.3 | 4.0 | /   | /   | /   | /   | 5.6 ± 6.0       |
| Rat 6  | 3.1               | 4.9        | 4.4 | 4.3 | -   | 4.5 | 3.4 | -   | 3.5 | -   | /   | /   | /   | /   | 4.0 ± 0.7       |
| Rat 7  | -                 | <u>7.2</u> | 4.6 | 4.4 | 3.6 | 4.0 | 3.1 | 3.4 | -   | 3.8 | 3.7 | 3.1 | /   | /   | 4.1 ± 1.2       |
| Rat 8  | <u>6.3</u>        | 4.1        | 4.1 | 3.9 | -   | -   | -   | -   | -   | -   | -   | -   | 3.4 | *   | 4.4 ± 1.1       |
| Rat 9  | <u>13.0</u>       | 3.3        | 3.8 | 5.9 | 6.8 | 3.2 | *   | *   | *   | *   | /   | /   | /   | /   | 6.0 ± 3.8       |
| Rat 10 | <u>22.7</u>       | 7.4        | 3.1 | 7.3 | -   | 5.9 | 5.1 | -   | 3.2 | -   | -   | /   | /   | /   | 7.8 ± 6.8       |
| Rat 11 | 7.4               | -          | -   | -   | -   | -   | -   | -   | 3.6 | -   | -   | -   | /   | /   | 5.5 ± 2.6       |
| Rat 12 | 4.6               | 3.9        | 4.2 | 4.1 | 4.2 | 4.5 | 3.5 | 3.6 | 4.5 | 4.2 | 3.1 | -   | -   | 3.3 | 4.0 ± 0.5       |

**Supplementary Table 10.** Maximal apnea duration (seconds) per rat per stimulation onsets. The underlined numbers represent the outlier detected in apnea duration. The symbol (/) means that no apnea detection was performed because the infusion was stopped. The symbol (\*) means that no apnea was detected due to the detachment of the thermistor. The symbol (-) means that no apnea was detected during the stimulation onset.

| <b>Sham VNS</b>     | Heart rate variability (ms) | Breathing rate variability (ms) | <b>Standard VNS</b> | Heart rate variability (ms) | Breathing rate variability (ms) | <b>Breathing-synch VNS</b> | Heart rate variability (ms) | Breathing rate variability (ms) |
|---------------------|-----------------------------|---------------------------------|---------------------|-----------------------------|---------------------------------|----------------------------|-----------------------------|---------------------------------|
| Rat 1               | 2.2                         | 410.3                           | Rat 5               | 74.3                        | 1119.4                          | Rat 9                      | 95.2                        | 969.3                           |
| Rat 2               | 5.1                         | 420.5                           | Rat 6               | 15.7                        | 599.9                           | Rat 10                     | 49.3                        | 942.8                           |
| Rat 3               | 3.9                         | 553.3                           | Rat 7               | 45.2                        | 1827.9                          | Rat 11                     | 84.8                        | 416.2                           |
| Rat 4               | 1.9                         | 207.9                           | Rat 8               | 49.1                        | 708.9                           | Rat 12                     | 8.4                         | 603.2                           |
| <b>Average ± SD</b> | 3.2 ± 1.5                   | 398.0 ± 142.5                   | <b>Average ± SD</b> | 46.1 ± 24.0                 | 1064.0 ± 556.2                  | <b>Average ± SD</b>        | 59.4 ± 39.3                 | 732.9 ± 269.0                   |

**Supplementary Table 11.** Heart rate and breathing rate variability (RMSSD) per rat during infusion.

| <b>Sham VNS</b>     | PTZ threshold (mg/kg) | <b>Standard VNS</b> | PTZ threshold (mg/kg) | <b>Breathing-synch VNS</b> | PTZ threshold (mg/kg) |
|---------------------|-----------------------|---------------------|-----------------------|----------------------------|-----------------------|
| Rat 1               | 73.5                  | Rat 5               | 48.7                  | Rat 9                      | 48.9                  |
| Rat 2               | 64.3                  | Rat 6               | 50.2                  | Rat 10                     | 57.4                  |
| Rat 3               | 86.2                  | Rat 7               | 65.4                  | Rat 11                     | 65.8                  |
| Rat 4               | 94.6                  | Rat 8               | 67.3                  | Rat 12                     | 67.9                  |
| <b>Average ± SD</b> | 79.7 ± 13.4           | <b>Average ± SD</b> | 57.9 ± 9.8            | <b>Average ± SD</b>        | 60.0 ± 8.7            |

**Supplementary Table 12.** PTZ threshold per rat.

|                            |                                    | Latency (s)                        | Ictal duration (s)                  | Post-ictal duration (s)           |
|----------------------------|------------------------------------|------------------------------------|-------------------------------------|-----------------------------------|
| Sham VNS                   | Rat 1                              | 173.9                              | 708.5                               | 34.3                              |
|                            | Rat 2                              | 286.5                              | 484.6                               | 103.8                             |
|                            | Rat 3                              | 349.1                              | 685.3                               | 80.1                              |
|                            | Rat 4                              | 356.4                              | 779.3                               | 37.4                              |
|                            | <b>Average <math>\pm</math> SD</b> | <b>291.5 <math>\pm</math> 84.4</b> | <b>664.4 <math>\pm</math> 126.4</b> | <b>63.9 <math>\pm</math> 33.8</b> |
| Standard VNS               | Rat 5                              | 279.4                              | 304.9                               | 112.7                             |
|                            | Rat 6                              | 156.6                              | 445.7                               | 45.1                              |
|                            | Rat 7                              | 152.8                              | 631.9                               | 54.6                              |
|                            | Rat 8                              | 213.3                              | 594.8                               | 54.6                              |
|                            | <b>Average <math>\pm</math> SD</b> | <b>200.5 <math>\pm</math> 59.5</b> | <b>494.3 <math>\pm</math> 149.7</b> | <b>66.7 <math>\pm</math> 31.0</b> |
| Breathing-synchronized VNS | Rat 9                              | 118.3                              | 469.0                               | 43.2                              |
|                            | Rat 10                             | 215.6                              | 473.4                               | 90.7                              |
|                            | Rat 11                             | 215.5                              | 573.9                               | 37.2                              |
|                            | Rat 12                             | 278.1                              | 536.8                               | 64.0                              |
|                            | <b>Average <math>\pm</math> SD</b> | <b>206.9 <math>\pm</math> 66.0</b> | <b>513.3 <math>\pm</math> 50.9</b>  | <b>58.8 <math>\pm</math> 24.2</b> |

**Supplementary Table 13.** Latency, Ictal duration, and post-ictal duration for each rat.
